# Supplementary material for: Differential expression pattern of Vago in bumblebee (Bombus terrestris), induced by virulent and avirulent virus infections
Source: PubMed Central journal article supplement (PMC5040954; doi:10.1038/srep34200), 2016-09-29
Supplement: srep34200-s1.pdf [file srep34200-s1.pdf]

## **Title:**

# **Differential expression pattern of *Vago* in bumblebee (*Bombus terrestris*), induced by virulent and avirulent virus infections**

Jinzhi Niu<sup>1,2</sup>, Ivan Meeus<sup>2</sup>, Guy Smagghe<sup>1,2,\*</sup>

<sup>1</sup>Key Laboratory of Entomology and Pest Control Engineering, College of Plant Protection, Southwest University, Chongqing 400716, China

<sup>2</sup>Department of Crop Protection, Faculty of Bioscience Engineering, Ghent University, Coupure Links 653, B-9000 Ghent, Belgium

\*Corresponding author: [guy.smagghe@ugent.be](mailto:guy.smagghe@ugent.be)

## **Supplementary data**

Figure S1: The eight conserved cysteine residues in VWC domain of *BtVago* compared with *CqVago*

|        |                                                               |
|--------|---------------------------------------------------------------|
| Culex  | MKTFGVIIILLVCCAIGGS-----LAAEAVLQNAEHPDYPGKCYDEGTQTVVAPLESA    |
| Bombus | MKLVFVLLLVAAIVFAAEKKEEERPKTFRRLIPADVLRDFPGMCFASRCATIEPTKSW    |
|        | ** . *::*... .. : . :: *:* * : . : : * :*                     |
| Culex  | KLPKSC TKVFCSTN-----LSLTYTT CGSVLVNDPHCEKIE-QDLTKDFPECHKYKCE  |
| Bombus | DLTPFCGRSTCV PADDNSGRLFELVEDCGPLPKANPKCKLSDKTNKTATFPDCCPIFECE |
|        | . * * : * * ** : : *:* : : * **:* : : **                      |
| Culex  | LEGVVTYH-----                                                 |
| Bombus | EGAKLEYPEIPTLPPPTTEIVETEKTPEATPAKA                            |
|        | . : *                                                         |

Figure S2: Predicated signal peptide cleavage site of *BtVago*

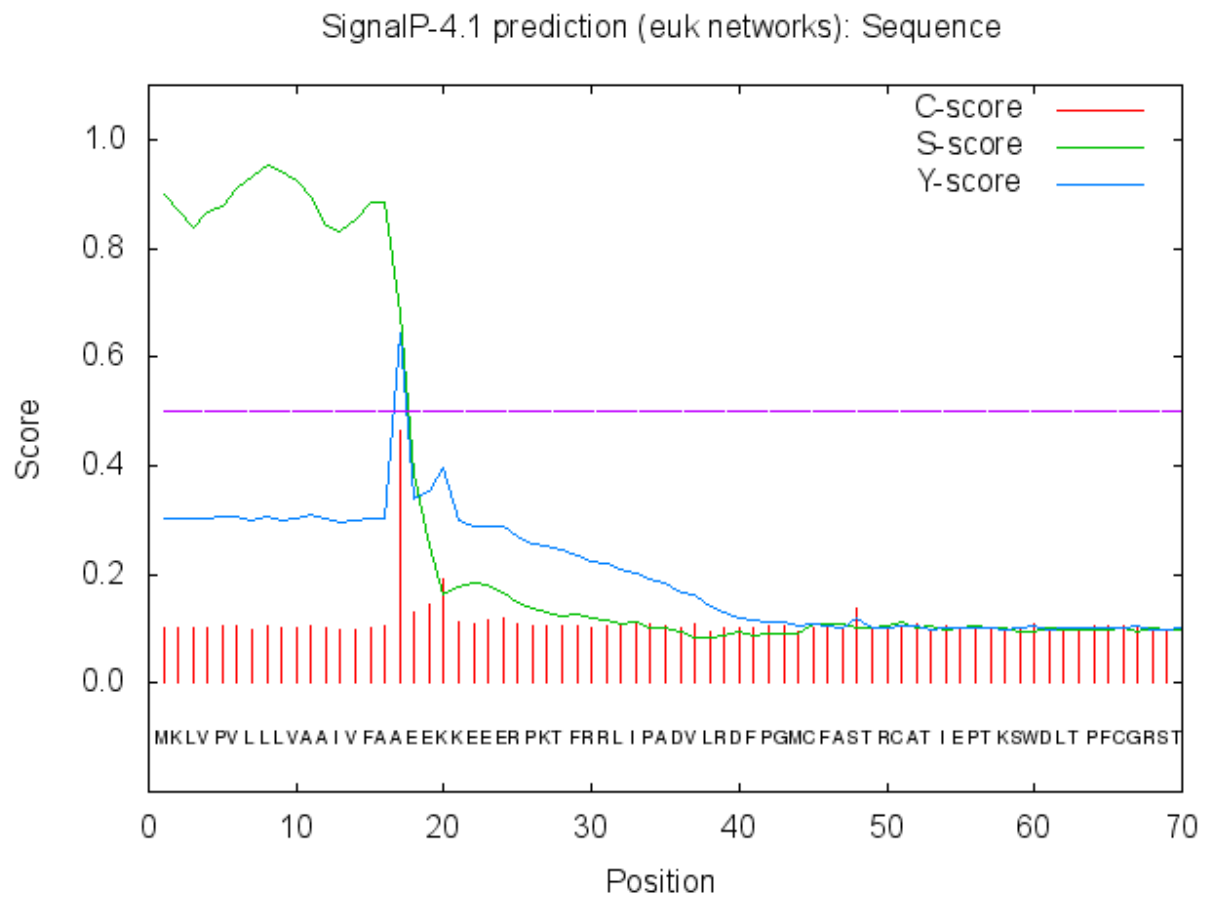

Figure S3: The expression of *BtDicer-2*, *BtVago* and *BtHop* upon the silencing of *BtDicer-2* (A) or *BtVago* (B)

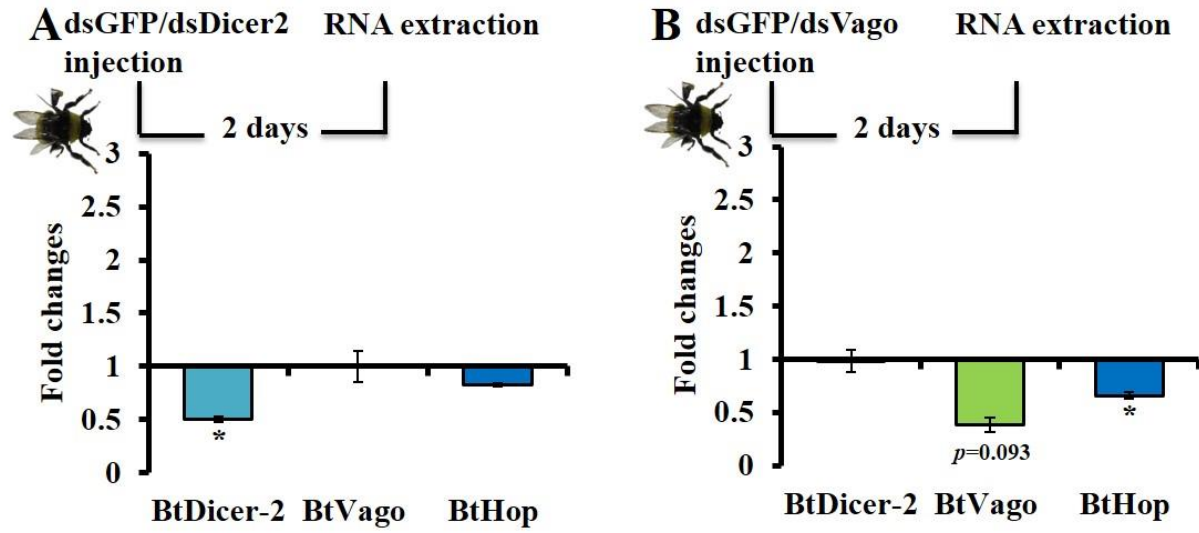

Figure S4: Silencing of *BtDicer-2* (A), *BtVago* (B), and *BtHop* (C) through injections of dsRNA

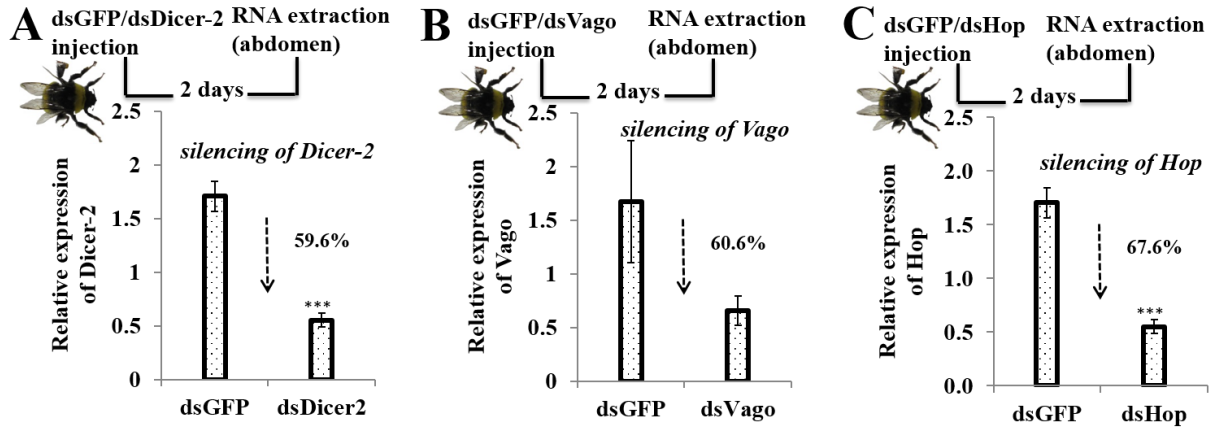

Table S1: Predicted NF- $\kappa$ B binding site in *BtVago* promoter region

| Factor name             | Start position | End position | Dissimilarity | String      | RE equally | RE query |
|-------------------------|----------------|--------------|---------------|-------------|------------|----------|
| RelA [T00595]<br>GATA-1 | 438            | 448          | 12.115729     | TCTAACGAAGC | 0.02146    | 0.01273  |
| [T00305]<br>GATA-1      | 735            | 742          | 4.138263      | CACGATAA    | 0.54932    | 0.69044  |
| [T00305]<br>GATA-1      | 925            | 932          | 1.520654      | TTATCATT    | 0.30518    | 0.65047  |
| [T00305]<br>GATA-1      | 1609           | 1616         | 4.052395      | TCGGATAA    | 0.54932    | 0.69044  |
| [T00305]<br>GATA-1      | 1896           | 1903         | 1.682543      | TTATCACA    | 0.30518    | 0.65047  |
| [T00267]<br>GATA-1      | 735            | 743          | 8.557309      | CACGATAAT   | 0.06866    | 0.14082  |
| [T00267]<br>GATA-1      | 924            | 932          | 4.979757      | TTTATCATT   | 0.18311    | 0.36798  |
| [T00267]<br>GATA-1      | 1609           | 1617         | 3.166737      | TCGGATAAG   | 0.11444    | 0.16757  |
| [T00267]<br>GATA-1      | 1895           | 1903         | 3.40581       | CTTATCACA   | 0.10681    | 0.17821  |

Table S2: Primers used in this study

| Name                               | Primer sequence                                      | Amplicon length | Purpose                           |
|------------------------------------|------------------------------------------------------|-----------------|-----------------------------------|
| qPCRVagoF2                         | TGTTACCCTTCAACGCAATTC                                | 194             | QPCR<br>for Vago                  |
| qPCRVagoR2                         | ACAGATTCCGAAACGCTGAT                                 |                 |                                   |
| Vago-T7dsF2                        | TAATACGACTCACTATAGGGAGACCTAGTCCCGGAAGTC<br>GAGA      | 418             | dsRNA<br>synthesis<br>for Vago    |
| Vago-T7dsR2                        | TAATACGACTCACTATAGGGAGAGTACGTACGAATTACA<br>AGATCAACT |                 |                                   |
| qPCRHopF3                          | TGGCACAATGTGTCTCATCTT                                | 186             | QPCR<br>for Hop                   |
| qPCRHopR3                          | GAGGTACACAACGAGGTCCAG                                |                 |                                   |
| Ds2ndHOP-F4                        | TAATACGACTCACTATAGGGAGATGTCCTTTGTTTCTGCT<br>CTGGA    | 374             | dsRNA<br>synthesis<br>for Hop     |
| Ds2ndHOP-R4                        | TAATACGACTCACTATAGGGAGATGACTGTCCTTCAGAAT<br>CTTGGA   |                 |                                   |
| q-Ri-dicer2-F2                     | TGGTCAAACATCAAGAACAACCA                              | 166             | QPCR for<br>Dicer-2               |
| q-Ri-dicer2-R2                     | GATCGGGGCCATACGAACAT                                 |                 |                                   |
| C-dsDicer2-2 <sup>nd</sup> -F4     | TAATACGACTCACTATAGGGAGAGCGAAGGTGTCACCAA<br>ATGT      | 437             | dsRNA<br>synthesis<br>for Dicer-2 |
| C-dsDicer2-2 <sup>nd</sup> -<br>R4 | TAATACGACTCACTATAGGGAGAGGGTGTGTAAGGCCT<br>GCAA       |                 |                                   |

## S1: Conserved proteins sequences used to construct phylogenetic tree of Vago

>Bombus\_terrestris

MKLVVLLLLVAAIVFAAEKKEEERPKTFRRLLIPADVLRDFPGMCFASTRCATIEPTKSWDLTPFCGRSTCVADDNSGR  
LFELVEDCGPLPKANPKCKLSDKTNKTATFPDCCPIFECEEGAKLEYPEIPTLPPPEIVETEKTEATPA

>PREDICTED:\_uncharacterized\_protein\_LOC411622\_Apis\_mellifera.

MKFAPILLVIAIVFAAEE-KEEERPKTFRRLLIPADVLRDFPGMCFASTRCATIEPTKSWELTPFCGRSTCVADDNSGR  
LFELVEDCGPLPKANPKCKLSDKTNKTAAPNCCPIFECEEGAKLEYPEIPTLPPPEIIEETKTSEEVPT

>PREDICTED:\_uncharacterized\_protein\_LOC105185794\_Harpegnathos\_saltator.

MEHAFVLLFTTIVFIAIADEKEEERPKTFRRLLIPADVLRDFPGMCFASTKCATIEPTKTWELSPFCGRSTCVADDNSGR  
LFELVEDCGPLPKANPKCKLSDKTNKTASFDCPIFECEEGAKLEYPEIPTLPPPEIEASEITAAPKV-

>PREDICTED:\_uncharacterized\_protein\_LOC100878806\_Megachile\_rotundata.

MKLATILLVVAVVFAAEE-KEEERPKTFRRLLIPADVLRDFPGRCFASTKCATIEPTKSWDLTPFCGRSTCVADDNSGR  
LFELVEDCGPLPKANPKCKLSEKTNKSAPFDCCPIFECEEGAKLEYPEIPTLPPPEIVETEKTEAAPA

>PREDICTED:\_uncharacterized\_protein\_LOC105623255\_Atta\_cephalotes.

MKLVFALLCVAVAFVAAEDAQVQERPKTFRRLLIPADVLRDFPGMCFASTKCATIEPTKSWELSPFCGRSTCVADDNSGR  
LFELVEDCGPLPKANPKCKLSDKTNKTASFPECCPIFECEEGAKLEYPEIPTLPPPSDEDAAKAQPETPKP

>PREDICTED:\_uncharacterized\_protein\_LOC105282831\_isoform\_X2\_Cerapachys\_biroi.

MAFLPHPCASSV-----KIERNFR-----ENFPGMCFASTKCATIEPTKSWQLAPFCGRSTCVADDNSGR  
LFELVEDCGPLPKANPKCKLSDKTNKTASFDCPIFECEEGAKLEYPEIPTLPTPTED-AAKGEPAAAAP

>PREDICTED:\_uncharacterized\_protein\_LOC105148313\_Acromyrmex\_echinator.

MKLVFALLCVAAVFVATQDAQVQERPKTFRRLLIPADVLRDFPGMCFASTKCATIEPTKSWELAPFCGRSTCVADDNSGR  
LFELVEDCGPLPKANPKCKLSDKTNKTASFPECCPIFECEEGAKLEYPEIPTLPPPSD-AAAAQPEAPKP

>PREDICTED:\_uncharacterized\_protein\_LOC105455873\_Wasmannia\_auropunctata.

MKTVFALLCVAAVFVATQGAQEQRPKTFRRLLIPADVLRDFPGMCFASTKCATIEPTKSWELAPFCGRSTCVADDNSGR  
LFELVEDCGPLPKANPKCKLSDKTNKTSSFDCCPIFECEEGAKLEYPEIPTLPPPSGEDAAAAQPQAPKP

>PREDICTED:\_uncharacterized\_protein\_LOC105258902\_Camponotus\_floridanus.

MKLIFILLCAAVAFVAAEGTTEQRPKTFRRLLIPADVLRDFPGMCFASTKCATIEPTKTWELSPFCGRSTCVADDNSGR  
LFELVEDCGPLPKANPKCKLSEKTNKTASFDCPIFECEEGVKEYPEIPTLPPPEAEAAANVPPEATPK

>PREDICTED:\_uncharacterized\_protein\_LOC105561162\_Vollenhovia\_emoryi.



MKTIFVLLCVAVAFVAAQDVQEQRPKTFRRLLIPADVLRDFPGMCFASTKCATIEPTKSWELAPFCGRSTCVADDNSGR  
LFELVEDCGPLPKANSKCKLSDKTNKTASFPDCCPIFECEGDGAKLEYDPIPTLPPPSDAI-AKAQPETPKP

>PREDICTED: *\_uncharacterized\_protein\_LOC103577816\_Microplitis\_demolitor*.

NKYFAIVLLVAAVVVAEEEE----ERP KTFRRLLIPADVLRDFPGMCFASTKCATVEPTKSWELSPFCGRSTCVSDDDSGR  
LFELVEDCGPLPKANPKCKLSEKTNKTASFPDCCPIFECEEGAKLEYPEIPTVPPPPS--EAEAKPEVAKV

>PREDICTED: *\_uncharacterized\_protein\_LOC105197444\_Solenopsis\_invicta*.

MKI-VFALCVAVAFVAANA-EEQERPKTFRRLLIPADVLRDFPGMCFASTKCATIEPLKSWELSPFCGRSTCVLADDNSGR  
LFELVEDCGPLPKANPKCKLSDKTNKTASFPDCCPLFECEEGAKLEYPEIPTLPPPSGVDATAKAQPEAPQS

>PREDICTED: *\_uncharacterized\_protein\_LOC100113619\_Nasonia\_vitripennis*.

FSLALVAIVAVVAVHAAEEKKDEDRPKTYRRLIPADVLRDFPGMCFASTKCATIEPKQSWDLAPFCGRSTCVADDNSGR  
LFELVEDCGPLPKANPKCKLSEKTNKTAPFPDCCPVFECEGDGAKLEYPEIPTLPPPTAEEIAKAAAAGKPA

>PREDICTED: *\_LOW\_QUALITY\_PROTEIN:\_uncharacterized\_protein\_LOC105428984\_partial\_Pogonomyrmex\_barbat  
us*.

WKLTYLFTISEVLFDSFLSGFYPNKRKCHLVLFHYIVDFPGTFASTKCATIEPGKSWELSPFCGRSTCVSADDNSGR  
LFELVEDCGPLPKANPKCKLSDKTNKTASFPECCPIFECEGDGATLEYDPIPTLPPPTED-AAKAQPEAPKP

>PREDICTED: *\_uncharacterized\_protein\_LOC105268204\_Fopius\_arisanus*.

MKYVVAILFIAALVAED--KDEERPKTYRRLIPADILRDFPGMCFASTKCATVEPGKTWDLSPFCGRSTCVPAEDNSGR  
LFELVEDCGPLPKENPKCKLSEKTKTSPFPDCCPIFECEEGAKLEYPEIPTIPPELVEPTETTTAKA--

>conserved\_hypothetical\_protein\_Pediculus\_humanus\_corporis.

MKFLIVFLIGFGAFCFGQETETTERPKVFRRLIPADVLRDFPGMCFASTKCTTVEPGKSWDLTPFCGRSTCVVAEEQAGR  
LLELVEDCGPLPKANPKCKLSEKTNKTAPFPDCCPIFECEKGVKLEYPELPTVPPPTDKKKA-----

>CG31997\_isoform\_A\_Drosophila\_melanogaster.

MSFHTLILTAFTVSLCAEQKKS DAGERIFKRLIPADVLRDFPGMCFASTRCATVEPGKSWDLTPFCGRSTCVQNEENDAK  
LFELVEDCGPLPLANDKCKLSEKTNKTASFPYCCPIFTCDPGVKLEYPEIGKDNDKKNSE-----

>PREDICTED: *\_uncharacterized\_protein\_LOC105220319\_Bactrocera\_cucurbitae*.

MKAFLVVACALFVCVAAQDDTSQTNSKIYKRLIPADVLRDFPGMCFASTRCATVEPTKTWELTPFCGRSTCVQNDENPAK  
LLELVEDCGPLPLANEKCKLSEKTNKTAPFPYCCPIFTCEPGVKLEYPEIPKEEAKKE-----

>uncharacterized\_protein\_LOC100167365\_precursor\_Acyrtosiphon\_pisum.

MDYRAVVLGVAIVLSADEKTPAPEARIYRRLIPADVLRDFPGLCFASTKCATVEPGHTWELSPFCGRSTCVQGE-GTDR  
LLELVEDCGPYPKSNPKCKLSEKTNKTASFPPECCPVFDCEPGVKLEYPEVTVVENPESSDDSTTTTSTEKP

>PREDICTED: \_uncharacterized\_protein\_LOC655864\_Tribolium\_castaneum.

MKV-FLVLALCLAVAAAEDKKEEERPKTFKRLIPADVLRDFPGMCFASRCATIEPGKTWELHPFCGRSTCVVSEDKPPR  
LLELVEDCGPLPLANPKCKLEEKTNKTAAPDCCPVFKCEEGAKLEYPEIPTVAPVPE--ASSTTPKA---

>hypothetical\_protein\_KGM\_07285\_Danaus\_plexippus.

MKY-LIVLAIIFSYAADD-KDDERPKTFRRLLIPADVLRDFPGLCFASRCATVEPGNTWDLAPFCGKSTCVVSEDTPPR  
LLELVEDCGPLPIANPKCKLTDKTNKTAPFPDCCPIFTCEDGVKLEYPELPTPPEEEKKEKS-----

>PREDICTED: \_uncharacterized\_protein\_LOC105665112\_Ceratitis\_capitata.

MKASLVIFVALFLYGAAQDAKNSELKIYKRLIPADVLRDFPGMCFASRCATVEPTKTWELTPFCGRSTCVQNEEDNPSK  
LLELVEDCGPLPLANEKCKLTGKTNKTAPFPYCCPIFICEPGIKLEYPEVPREELNKE-----

>unknown\_Manduca sexta.

MKYLVVVAVFALAFAAEEKE---DIPKTYKRLIPADVLRDFPGTCFASRCATVEPGNTWELSPFCGRSTCVLSEDHPPR  
LLELVEDCGPLPLANPKCKLTDKTNKTAPFGCCPIFTCEEGAKLEYPELPTPPPEGE--KAEEKPKKA--

>similar\_to\_CG31997\_Papilio\_xuthus.

MKYLFLAVFALAFAAEEE-KDGERPKTFRRLLIPADVLRDFPGLCFASRCATVEPGNSWDLAPFCGRSMCVVSEDTPPR  
LLELVEDCGPLPLANPKCKLTDKTNKTAPFGCCPIFTCEDGVKLEYPELPTAAPEEEK-KAEEKPKA---

>conserved\_hypothetical\_protein\_Culex\_quinquefasciatus.

GVFVVAALCVANVFAADEPTKDEGVKIYKRLIPADVLRDFPGMCFASRCATIEPGKSWDLAPFCGRSTCVVSESNAQ  
LLELVEDCGPLPLANDKCKLTDKTNKTAPFPYCCPKFTCEPGVKLEYPEIKPSDASEEK-----

>AAEL000445-PA\_Aedes\_aegypti.

GVLIAATLCVANVFAADEPTDEDTVKIYKRLIPADVLRDFPGMCFASRCATIEPGKSWDLAPFCGRSTCVVSETNPSQ  
LLELVEDCGPLPLANDKCKLTDKTNKTAPFPYCCPKFTCEPGVKLEYPDVKGPEAAPEDD--KKN-----

>PREDICTED: \_uncharacterized\_protein\_LOC105381502\_Plutella\_xylostella.

MKY-LVAFVAVFALAFAAEEKAEERPKTFRRLLIPADVLRDFPGMCFASRCATVEPGNAWDLSPFCGRSTCVVSEDEPPR  
LLELVEDCGPLPLANDKCKLTDKTNKTAPFGCCPVFTCTDGAKLEYPELPTPPPEGE----EKKPEEEKP

>PREDICTED: \_uncharacterized\_protein\_LOC101888253\_Musca\_domestica.

MKFFAVLLVACVYGAATDKTKEEAPKIYKRLIPADVLRDFPGMCFASRCATVEVGKSWELTPFCGRSTCVQNEEDPSK  
LLELVEDCGPLPLANDKCKLTEKTNKTAAPFYCCPVFTCEPGVKLEYPEAVKETKKE-----

>AGAP002085-PA\_Anopheles\_gambiae\_str.\_PEST.

MRSFTVVAVLALYVQAADEATKDAAPKTYKRLIPADVLRDFPGMCFASRCATFEPGQYWDLTPFCGRSTCVLSDDAQPR

LLELVEDCGPLPLANDKCKLTEKTNKTAPFPACPTFTCEPGAKLEYPEIKTAPESTSEQN-----

>hypothetical\_protein\_YQE\_10125\_partial\_Dendroctonus\_ponderosae.

-----MCFASTKCATVEPGKTWELYPFCGRSTCVVSEDQPPR

LLELVEDCGPLPLANEKCKLEEKTNKTAPFPACPEFKCEAGAKLEYPEIPTVAPVPEDASTTTAKSA---

>PREDICTED:\_uncharacterized\_protein\_LOC101741978\_Bombyx\_mori.

MKYLIVLAVFALAAFAEEKE---ERPKTFRRILPADVLRDFPGMCFASTRCITVEPGNTWELSPFCGRSTCVVSEDQPPR

LLELVEDCGPLPLTNPCKQLTEKTNKTAPFPGCCPIFTCEEGAKLEYPELTPPPEDK--KAEEKPKA---

>unknown\_Culicoides\_sp.\_LJH-2002.

MRPFVFFVIVSLSFASET-KNDDGIKVYKRLIPADVLRDFPGVCFASTKCAMFEPGKQWDLKPFGRSTCVTPEDGSSR

LLELVEDCGPLPIANDKCKLTEKTNKTADFPYCCPQFACQDGAKLEYPEVKTSSA-----

>hypothetical\_protein\_DAPPUDRAFT\_214640\_Daphnia\_pulex.

MKFILCFSLFVLVASVE-----ITPKLTREIKADVLRDFPGVCYASTQCRTFKENEEWDLKPFCKGKSIKGA--DGI

LKERVSDCGPPAKANPECKV--NANATLPYPNCCPVYDCAPGVQLEFPDIPVA-----

>single\_VWC\_domain\_protein\_1\_Litopenaeus\_vannamei.

MKF-LLIACLGLVFAQQGPADLQGGPFVDRDLKADVLRDFPELCFSSTNFRLFLENQSWSLFPFCGKAECVKSG---AD

YIERVHDCGPQPKNAEACTILQRNDTILEYPSCCPKYVCPDGVTLLEYPEIQKQNOAALQAAAAAREAAAGPQ

>Chain\_A\_Structure\_Of\_A\_Chordin-Like\_Cysteine-Rich\_Repeat\_(Vwc\_Module)\_From\_Collagen\_lia.

-----YVEFQEA-----GSCVQDGQ--RYNDKDVWKPEP-CRICVCDTGTLCDDI

ICEDVKDC-----LSPEIPFGECCPI--CPA-----DLAAAA-----

S2: Sequence of dsGFP used as non-specific dsRNA

>dsGFP fragment 455 bp

TGATCGCGCTTCTCGTTGGGGTCTTTGCTCAGGGCGGACTGGGTGCTCAGGTAGTGGTTGTCGGGCAGCAGCACG  
GGGCCGTCGCCGATGGGGGTGTTCTGCTGGTAGTGGTCGGCGAGCTGCACGCTGCCGTCCTCGATGTTGTGGCG  
GATCTTGAAGTTCACCTTGATGCCGTTCTTCTGCTTGTGCGCCATGATATAGACGTTGTGGCTGTTGTAGTTGTACT  
CCAGCTTGTGCCCCAGGATGTTGCCGTCCTCCTTGAAGTCGATGCCCTTCAGCTCGATGCGGTTACCAGGGTGTC  
GCCCTCGAACTTCACCTCGGCGCGGGTCTTGTAGTTGCCGTCGTCCTTGAAGAAGATGGTGCGCTCCTGGACGTAG  
CCTTCGGGCATGGCGGACTTGAAGAAGTCGTGCTGCTTCATGTGGTCGGGGTAGCGGCTGAAGCACTGCACGCCG  
TA
